# Supplementary material for: Rational design of TiO2–V2O5–C nanostructure grafted by N-doped graphene with enhanced photocatalysis and lithium ion store performances
Source: Royal Society of Chemistry journal article supplement (doi:10.1039/c4ra08931f), 2014-01-01
Supplement: c4ra08931f1.pdf [file c4ra08931f1.pdf]

**Rational design of TiO<sub>2</sub>-V<sub>2</sub>O<sub>5</sub> -C nanostructure grafted by N-doped  
graphene with enhanced photocatalysis and lithium ion store  
performances**

Guohui Qin<sup>\*,a,b</sup>, Xuan Wu<sup>a,b</sup>, Hongjuan Zhang<sup>a,b</sup>

*<sup>a</sup> School of chemical Engineering & technology, Tianjin University, Tianjin 300072 , China.*

*<sup>b</sup> Synergetic Innovation Center of Chemical Science and Engineering, Tianjin 300072,China.*

**Directory of contents**

**Fig S1.** Magnified XRD patterns of the sample GN-TV-C

**Fig S2.** N<sub>2</sub> adsorption and desorption isotherm (A) and pore size distribution GN-TV-C(B)

**Fig S3.** Charge/discharge curves CV curves of the composite GN-TV-C with different amounts of V<sub>2</sub>O<sub>5</sub>

**Fig S4.** The TEM image of GN-TV-C after 1000<sup>th</sup> cycles.

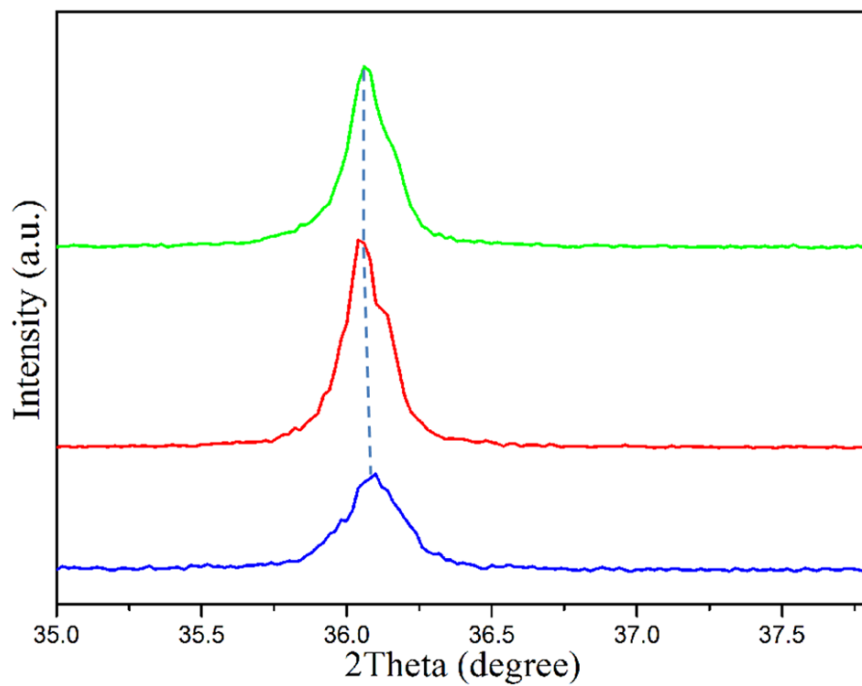

Fig S1. Magnified XRD patterns of the sample GN-TV-C

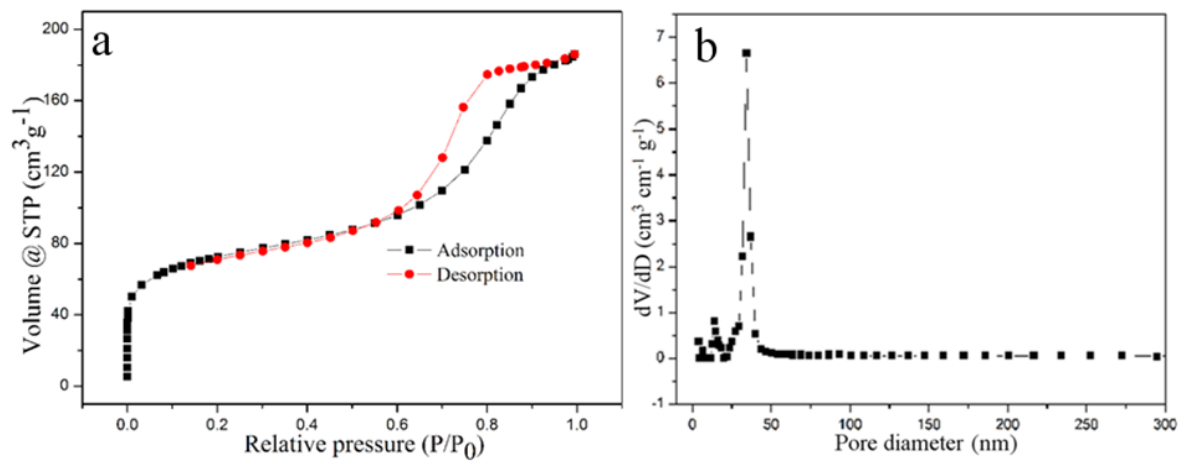

Fig S2.  $N_2$  adsorption and desorption isotherm (a) and pore size distribution GN-TV-C(b)

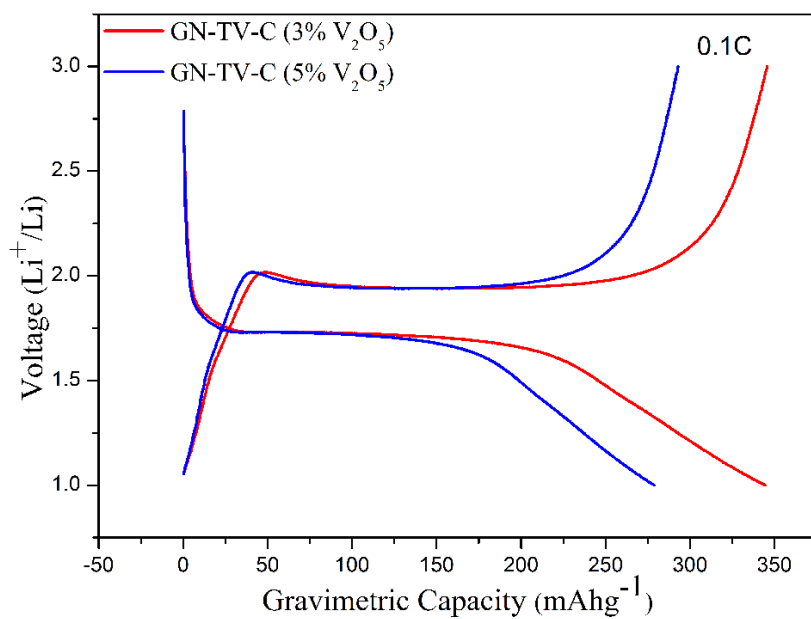

**Fig S3.** Charge/discharge curves CV curves of the composite GN-TV-C with different amounts of  $V_2O_5$

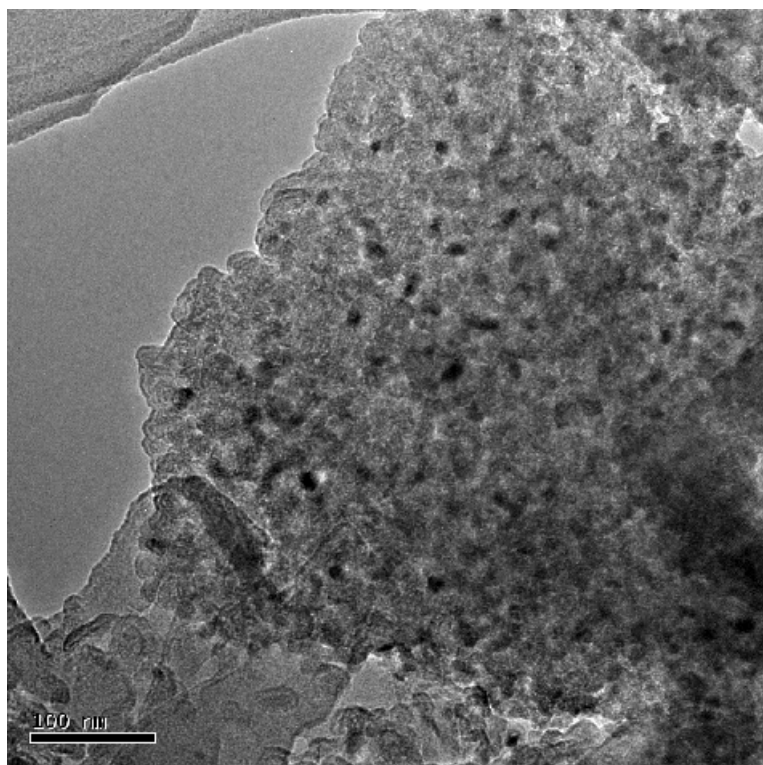

**Fig S4.**The TEM image of GN-TV-C after 1000<sup>th</sup> cycles.
